# Supplementary material for: Blending of cellulolytic enzyme preparations from different fungal sources for improved cellulose hydrolysis by increasing synergism
Source: Royal Society of Chemistry journal article supplement (doi:10.1039/c4ra08129c), 2014-01-01
Supplement: c4ra08129c1.pdf [file c4ra08129c1.pdf]

## Supplementary information

### Blending of cellulolytic enzyme preparations from different fungal sources for improved cellulose hydrolysis by increasing synergism

Mukund Adsul,\* Bhawna Sharma, Reeta Rani Singhania, Jitenrdra Kumar Saini, Ankita Sharma, Anshu Mathur, Ravi Gupta, and Deepak Kumar Tuli\*

DBT-IOC Centre for Advanced Bioenergy Research, Indian Oil R & D centre, Sector-13,  
Faridabad-121007 (India)

#### Results:

**Table S1** Enzyme activities of isolated fungal strains and a *P. janthinellum* EMS-UV-8

| Fungal strains | Enzyme activities (IU/ml) |        |                      |               |
|----------------|---------------------------|--------|----------------------|---------------|
|                | FPU                       | CMCase | $\beta$ -glucosidase | Protein-mg/ml |
| IODBF-1        | 0.8                       | 17.4   | 2.3                  | 3.8           |
| IODBF-5        | 1.01                      | 19.4   | 2.4                  | 3.7           |
| DBT-IOC-ASMA   | 1.6                       | 21.7   | 3.7                  | 3.4           |
| PDI-6          | 0.78                      | 16.2   | 0.58                 | 2.3           |
| PDI-8          | 0.66                      | 15     | 0.39                 | 2.9           |
| A2-Old         | 0.95                      | 27.4   | 0.1                  | 6.0           |
| MGA            | 0.94                      | 21.8   | 2.9                  | 5.1           |
| EMS-UV-8       | 2.2                       | 15.3   | 0.33                 | 5.7           |

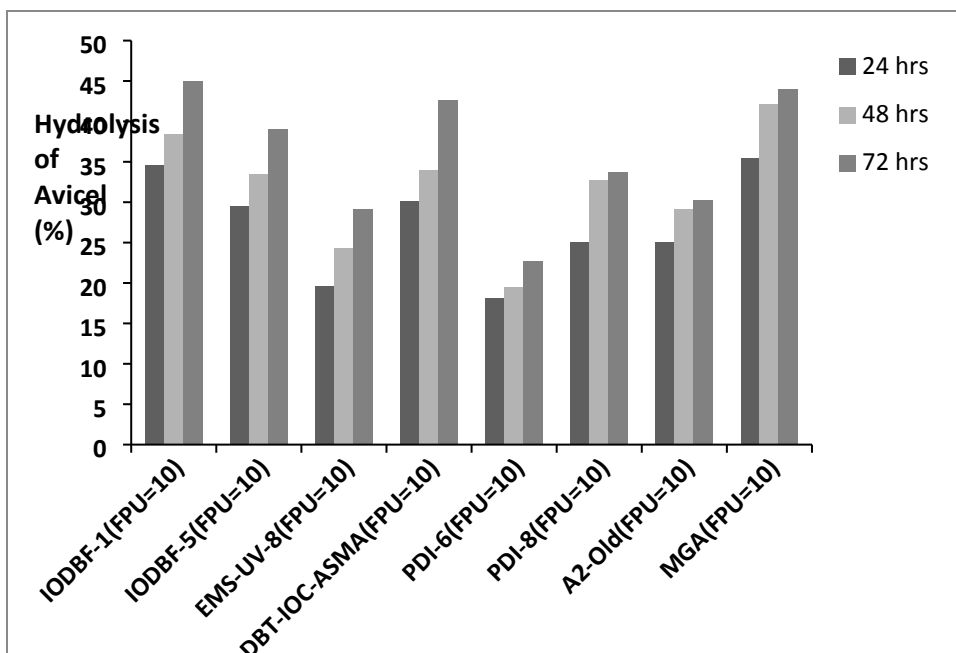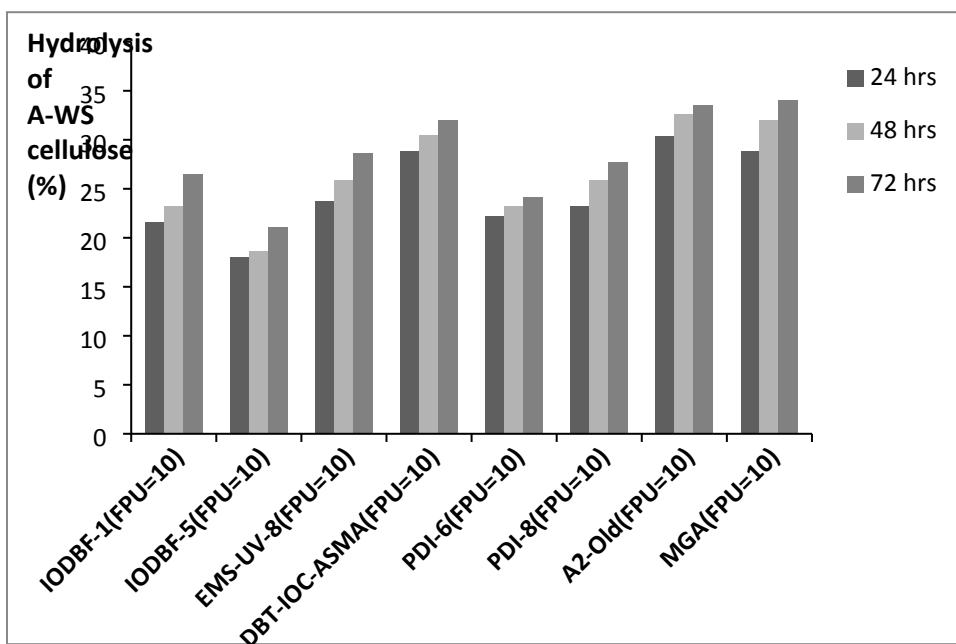

**Figure S1** Enzymatic hydrolysis of avicel and dilute acid treated wheat straw/A-WS (4% w/v) using 10 FPU from each fungal strain.

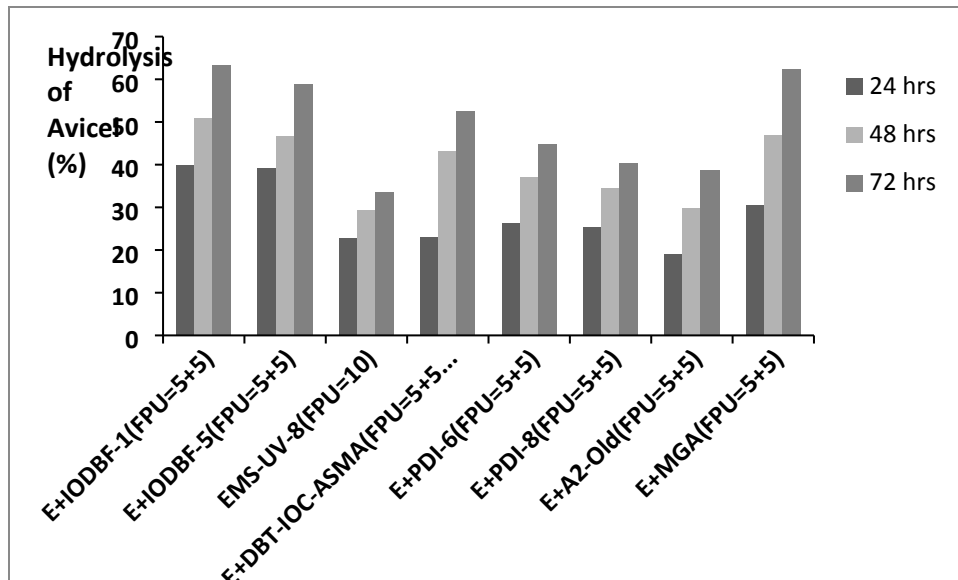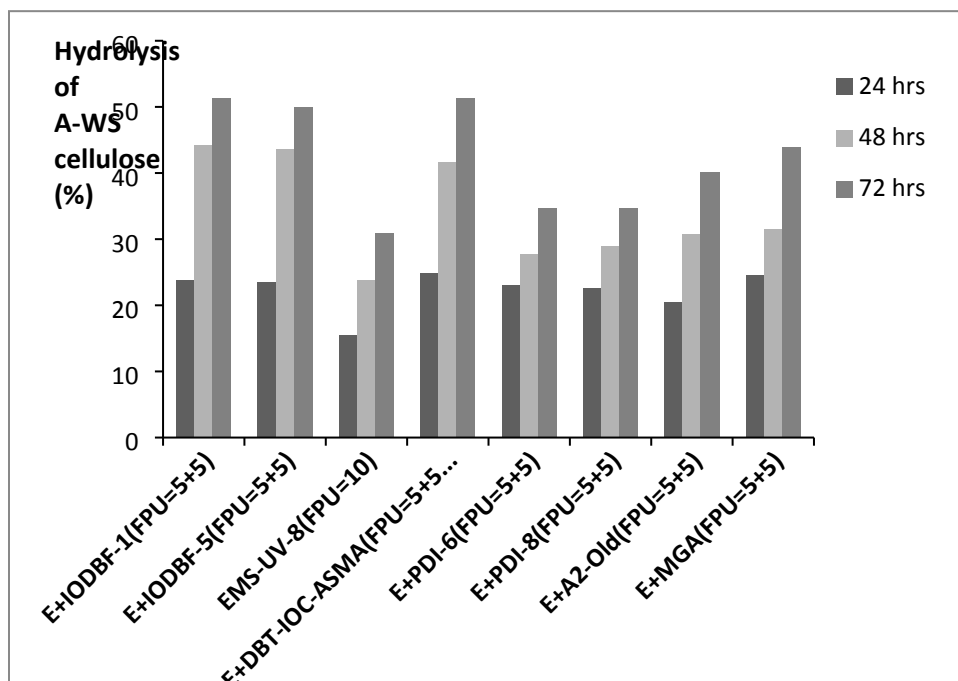

**Figure S2** Enzymatic hydrolysis of avicel and A-WS (4% w/v) using 5 FPU from EMS-UV-8 (E) and 5 FPU from other seven fungal strains separately.
